# Supplementary material
Source: HighWire-hosted journal article supplement (https://ajnr-sso.highwirestaging.com/highwire/filestream/92755/field_highwire_adjunct_files/0/0255.pdf)
Supplement: 0255.pdf [file 0255.pdf]

## Online Supplementary Material

**Supplementary Table 1.** Participant factors favoring EVT, stratified by patients with mild yet disabling deficits with respect to their professions vs. patients with mild deficits without described profession. No significant interactions between the effect of profession and each of the respondent variable subgroups on EVT decision-making were observed (*Supplementary Table 3*).

|                                    | Profession,<br>yes | Profession,<br>no | Risk Ratio (95%CI) |
|------------------------------------|--------------------|-------------------|--------------------|
| Participant Characteristics, n (%) |                    |                   |                    |
| <i>Speciality</i>                  |                    |                   |                    |
| Interventionalists                 | 622 (59.1)         | 345 (43.7)        | 1.35 (1.23-1.48)*  |
| Non-interventionalists             | 211 (51.2)         | 105 (34.0)        | 1.51 (1.26-1.81)*  |
| <i>Hospital type</i>               |                    |                   |                    |
| Teaching                           | 765 (56.8)         | 407 (40.3)        | 1.41 (1.29-1.54)*  |
| Non-Teaching                       | 68 (58.6)          | 43 (49.4)         | 1.19 (0.91-1.54)   |
| <i>24/7 stroke EVT coverage</i>    |                    |                   |                    |
| No                                 | 83 (61.0)          | 42 (41.2)         | 1.48 (1.13-1.94)*  |
| Yes                                | 750 (56.5)         | 408 (41.0)        | 1.38 (1.26-1.51)*  |
| <i>Gender</i>                      |                    |                   |                    |
| Male                               | 692 (56.2)         | 387 (41.9)        | 1.34 (1.22-1.47)*  |
| Female                             | 141 (63.0)         | 63 (37.5)         | 1.68 (1.35-2.09)*  |
| <i>Age (years)</i>                 |                    |                   |                    |
| < 40 years                         | 239 (59.2)         | 128 (42.2)        | 1.40 (1.20-1.63)*  |
| 40 – 50 years                      | 335 (55.5)         | 197 (43.5)        | 1.28 (1.12-1.45)*  |
| 51 – 60 years                      | 171 (53.4)         | 84 (35.0)         | 1.53 (1.25-1.87)*  |
| > 60 years                         | 88 (64.7)          | 41 (40.2)         | 1.61 (1.23-2.10)*  |
| <i>Career stage</i>                |                    |                   |                    |
| In training                        | 31 (51.2)          | 16 (35.6)         | 1.45 (0.91-2.31)   |
| Board certified < 5 years          | 108 (61.4)         | 64 (48.5)         | 1.27 (1.02-1.56)*  |

|                                                |            |            |                   |
|------------------------------------------------|------------|------------|-------------------|
| Board certified 5-10 years                     | 183 (58.0) | 106 (44.7) | 1.29 (1.09-1.53)* |
| Board certified > 10 years                     | 511 (56.0) | 264 (38.6) | 1.45 (1.30-1.62)* |
| <i>Experience in INR (years)</i>               |            |            |                   |
| 0 – 5 years                                    | 121 (59.3) | 61 (39.9)  | 1.49 (1.19-1.86)* |
| 5 – 10 years                                   | 169 (52.2) | 94 (38.7)  | 1.35 (1.12-1.63)* |
| 10 – 15 years                                  | 186 (60.4) | 108 (46.8) | 1.29 (1.10-1.52)* |
| 15 - 20 years                                  | 131 (61.8) | 75 (47.2)  | 1.31 (1.08-1.59)* |
| > 20 years                                     | 113 (54.3) | 53 (34.0)  | 1.60 (1.24-2.06)* |
| NA                                             | 113 (54.3) | 59 (37.8)  | 1.44 (1.13-1.82)* |
| <i>Annual stroke treatment volume (center)</i> |            |            |                   |
| < 50                                           | 105 (55.9) | 55 (39.0)  | 1.43 (1.12-1.83)* |
| 50 – 100                                       | 191 (62.0) | 102 (44.2) | 1.40 (1.19-1.66)* |
| 100 – 200                                      | 291 (49.8) | 163 (37.2) | 1.34 (1.16-1.55)* |
| > 200                                          | 246 (64.1) | 130 (45.1) | 1.42 (1.22-1.65)* |
| <i>Annual stroke treatment volume (person)</i> |            |            |                   |
| < 10                                           | 38 (55.9)  | 21 (41.2)  | 1.36 (0.92-2.01)  |
| 10 – 50                                        | 370 (52.3) | 201 (37.9) | 1.38 (1.21-1.57)* |
| 50 – 100                                       | 231 (60.2) | 136 (47.2) | 1.27 (1.10-1.48)* |
| > 100                                          | 74 (80.4)  | 34 (49.3)  | 1.63 (1.26-2.12)* |
| NA                                             | 120 (56.6) | 58 (36.5)  | 1.55 (1.22-1.97)* |

*EVT: Endovascular therapy*

*INR: Neurointervention*

*NA: Not applicable*

\* Significant associations (p < 0.001)

**Supplementary Table 2.** Demographic characteristics of the participating physicians.

---

Specialty – n (%)

Interventional Neuroradiologist 170 (46.5)

Interventional Radiologists 18 (4.9)

|                                                          |            |
|----------------------------------------------------------|------------|
| Interventional Neurologist                               | 36 (9.8)   |
| Neurologist                                              | 97 (26.5)  |
| Neurosurgeons                                            | 39 (10.7)  |
| Other                                                    | 6 (1.6)    |
| Geographic region – <i>n</i> (%)                         |            |
| North America                                            | 95 (26.0)  |
| Europe                                                   | 179 (48.9) |
| Asia & Pacific & Africa                                  | 79 (21.6)  |
| South America                                            | 13 (3.6)   |
| Hospital Setting – <i>n</i> (%)                          |            |
| Teaching                                                 | 337 (92.1) |
| Non-teaching                                             | 29 (7.9)   |
| Physician gender – <i>n</i> (%)                          |            |
| Female                                                   | 56 (15.3)  |
| Male                                                     | 308 (84.2) |
| Do not wish to declare                                   | 2 (0.6)    |
| Age - <i>n</i> (%)                                       |            |
| Under 30 years                                           | 5 (1.4)    |
| 31 – 40 years                                            | 96 (26.2)  |
| 41 – 50 years                                            | 151 (41.3) |
| 51 – 60 years                                            | 80 (21.9)  |
| Over 60 years                                            | 34 (9.3)   |
| Experience in vascular neurointerventions - <i>n</i> (%) |            |
| 0 - 5 years                                              | 51 (13.9)  |

|                                                                |            |
|----------------------------------------------------------------|------------|
| 5 -10 years                                                    | 81 (22.1)  |
| 10 – 15 years                                                  | 77 (21.0)  |
| 15 – 20 years                                                  | 53 (14.5)  |
| More than 20 years                                             | 52 (14.2)  |
| Not applicable                                                 | 52 (14.2)  |
| Annual center thrombectomy volume – <i>median range</i>        | 100-200    |
| Annual personal thrombectomy volume – <i>median range</i>      | 10-50      |
| Number of interventionalists covering INR call – <i>median</i> | 3 (3-5)    |
| <i>(IQR)</i>                                                   |            |
| Availability of 24/7 coverage for EVT - <i>n (%)</i>           |            |
| Yes                                                            | 332 (90.7) |
| No                                                             | 34 (9.3)   |

---

*IQR: Interquartile range*

*INR: Neurointervention*

*EVT: Endovascular therapy*

**Supplementary Table 3.** Results of subgroup interaction analyses for profession and each of the respondent variable subgroups on EVT decision-making.

| Variable                 | P-Value |
|--------------------------|---------|
| Speciality               |         |
| Interventionalists       | Ref.    |
| Non-interventionalists   | 0.299   |
| Hospital type            |         |
| Teaching                 | Ref.    |
| Non-teaching             | 0.221   |
| 24/7 stroke EVT coverage |         |
| No                       | Ref.    |
| Yes                      | 0.615   |
| Gender                   |         |

|                                         |       |
|-----------------------------------------|-------|
| Male                                    | Ref.  |
| Female                                  | 0.064 |
| Age (years)                             |       |
| > 40                                    | Ref.  |
| 40 – 50                                 | 0.360 |
| 51 – 60                                 | 0.504 |
| > 60                                    | 0.377 |
| Career stage                            |       |
| In Training                             | Ref.  |
| Board certified < 5 years               | 0.595 |
| Board certified 5 – 10 years            | 0.647 |
| Board certified > 10 years              | 0.997 |
| Experience in INR (years)               |       |
| > 5                                     | Ref.  |
| 5 – 10                                  | 0.513 |
| 10 – 15                                 | 0.321 |
| 15 – 20                                 | 0.404 |
| > 20                                    | 0.676 |
| NA                                      | 0.833 |
| Annual stroke treatment volume (center) |       |
| > 50                                    | Ref.  |
| 50 – 100                                | 0.898 |
| 100 – 200                               | 0.643 |
| > 200                                   | 0.951 |
| Annual stroke treatment volume (person) |       |
| > 10                                    | Ref.  |
| 10 – 50                                 | 0.935 |
| 50 – 100                                | 0.766 |
| > 100                                   | 0.440 |
| NA                                      | 0.565 |

*EVT: Endovascular therapy*

*INR: Neurointervention*

NA: Not applicable

## MeVO-FRONTIERS - Survey scenarios included in the study

### Case 1/7

Q1.5 Case 1, scenario 5:

86-year-old male, otherwise healthy, **NIHSS 3** with left arm drift and hemineglect. Onset-to-CT time 2 hours 10 minutes.

ASPECTS 10, core (CBF <30%) volume is 7 ml. Patient is **not eligible for tPA**.

Q1.5image

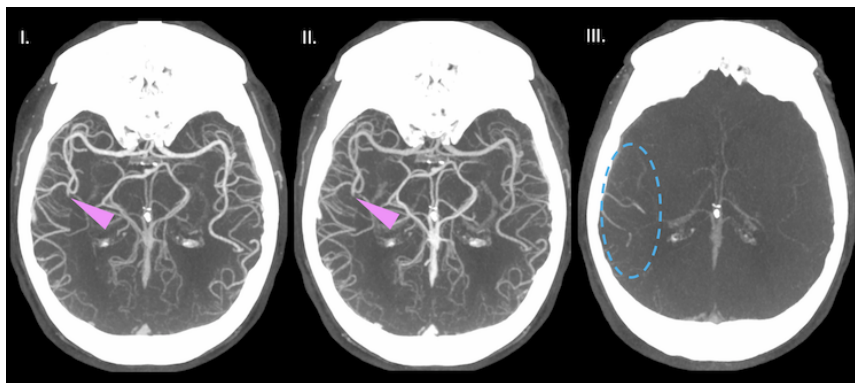

Q1.5.1 Should this patient with MeVO be **treated with EVT**?

- Yes, the patient should be taken for EVT immediately
- No, this patient should not be treated with EVT
- The patient should only be treated if his neurological deficit worsens

Q1.5.1ii If no, **why?** (what is your top reason)

- Occlusion too distal to be safely accessible
- Expected benefits too small
- Insufficient support in guidelines/scientific evidence
- Insufficient resources to treat such cases with EVT in our institution
- Other (specify) \_\_\_\_\_

Q1.5.2 If the patient would be eligible for a **trial which randomizes MeVO patients between EVT and no EVT**, would you be willing to randomize?

- Yes
- No, because of practical reasons (e.g. no experience of our team/center to participate in a trial, etc.)
- No, because I have no equipoise (I already know the answer to the question)

Q1.6 Case 1, scenario 6:

**56-year-old** male, professional piano player, NIHSS 3 with left arm drift and hemineglect. Onset-to-CT time 2 hours 10 minutes.

ASPECTS 10, core (CBF <30%) volume is 7 ml. Patient is **not eligible for tPA**.

#### Q1.6image

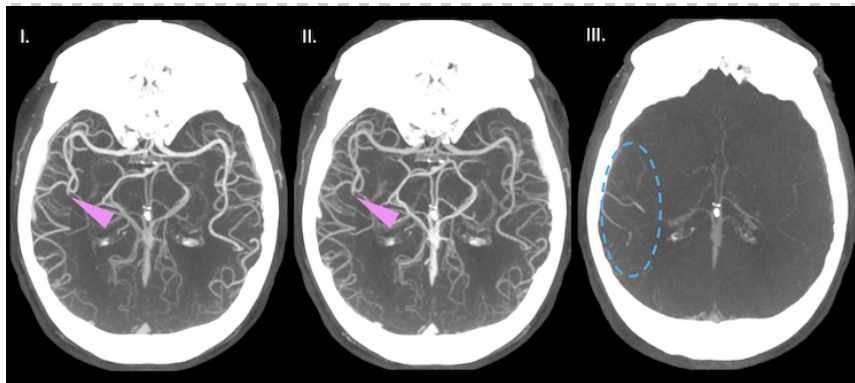

Q1.6.1 Should this patient with MeVO be **treated with EVT**?

- Yes, the patient should be taken for EVT immediately
- No, this patient should not be treated with EVT
- The patient should be treated only if his neurological deficit worsens

Q1.6.1ii If no, **why?** (what is your top reason)

- Occlusion too distal
- Expected benefits too small
- Insufficient support in guidelines/scientific evidence for such cases
- Insufficient resources to treat such cases with EVT in our institution
- Other (specify) \_\_\_\_\_

Q1.6.2 If the patient would be eligible for a **trial which randomizes MeVO patients between EVT and no EVT**, would you be willing to randomize?

- Yes
- No, because of practical reasons (e.g. no experience of our team/center to participate in a trial, etc.)
- No, because I have no equipoise (I already know the answer to the question)

#### Q1.7image

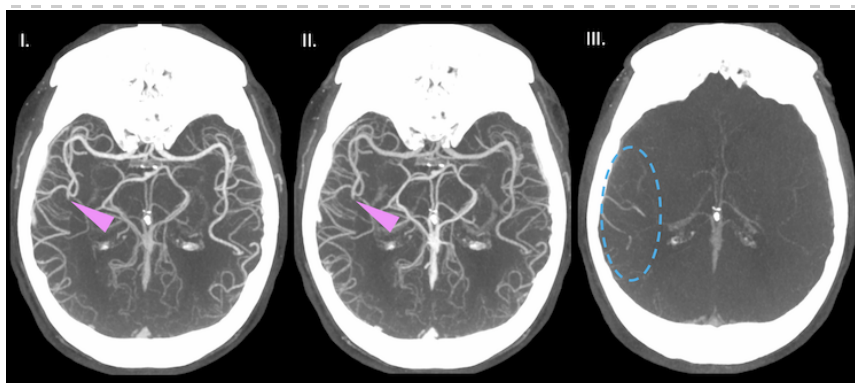

Q1.7 Case 1, all scenarios:

If you were to treat this MeVO, what would be your preferred **first-line approach**?

- Direct contact aspiration
- Stent-retriever
- Combined stent-retriever and contact aspiration
- Intra-arterial thrombolytics
- Other (specify) \_\_\_\_\_
- Not applicable (I am not an interventionalist)
- I would not treat any of the presented scenarios

Q1.8 Which **anesthesia** approach would you use in this MeVO?

- I do all EVTs (LVO and MeVO) under general anesthesia
- I do all MeVOs under general anesthesia
- If this patient was even slightly uncooperative (lower threshold than for LVO), I would use general anesthesia
- If this patient was uncooperative (same threshold as for LVO), I would use general anesthesia
- I do all EVTs (including MeVO) under local anesthesia/conscious sedation (5)
- I would start under local anesthesia/conscious sedation but convert to general anesthesia if the patient is even slightly uncooperative (lower threshold than for LVO)
- I would start under local anesthesia/conscious sedation but convert to general anesthesia if the patient is uncooperative (same threshold as for LVO)

## Case 2/7

Q2.5 Case 2, Scenario 5:

79-year-old male, otherwise healthy, **NIHSS 4** with complete plegia of the left leg. Onset-to-CT time 2 hours 15 minutes. Core (CBF <30%) volume is 9 ml, penumbra (Tmax >6s) 30 ml. Patient is **not eligible for tPA**.

Q2.5image

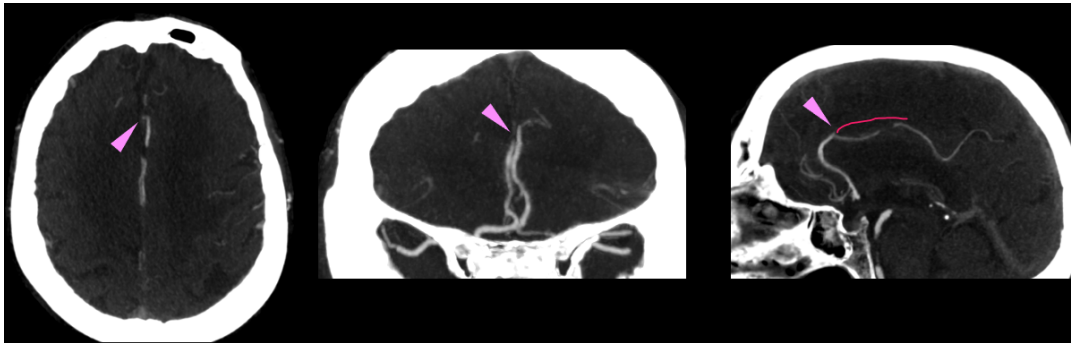

Q2.5.1 Should this patient with MeVO be treated with EVT?

- Yes, the patient should be taken to EVT immediately
- No, this patient should not be treated with EVT
- The patient should only be treated if his neurological deficit worsens

Q2.5.1ii If no, **why?** (what is your top reason)

- Occlusion too distal to be safely accessible
- Expected benefits too small
- Insufficient support in guidelines/scientific evidence
- Insufficient resources to treat such cases with EVT in our institution
- Other (specify) \_\_\_\_\_

Q2.5.2 If the patient would be eligible for a **trial which randomizes MeVO patients between EVT and no EVT**, would you be willing to randomize?

- Yes
- No, because of practical reasons (e.g. no experience of our team/center to participate in a trial, etc.)
- No, because I have no equipoise (I already know the answer to the question)

Q2.6 Case 2, Scenario 6:

**53-year-old** male, marathon runner, NIHSS 4 with mild left leg and mild sensory loss. Onset-to-CT time 2 hours 15 minutes. Core (CBF <30%) volume is 9 ml, penumbra (Tmax >6s) 30ml. Patient is **not eligible for tPA**.



Q2.6image

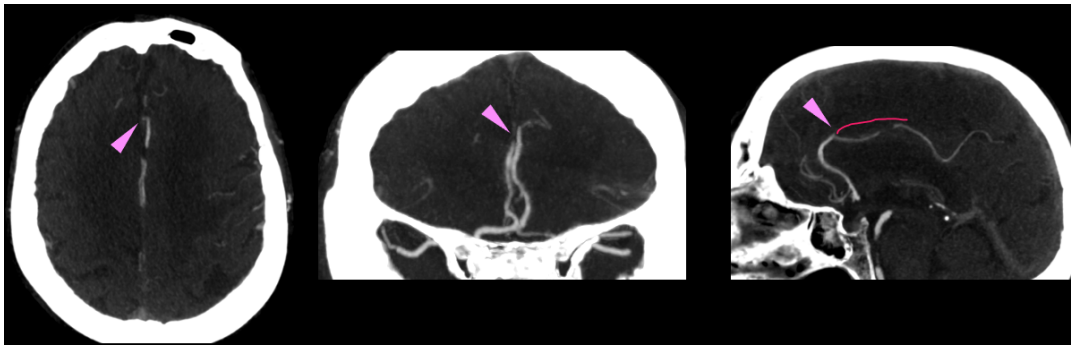

Q2.6.1 Should this patient with MeVO be treated with EVT?

- Yes, the patient should be taken to EVT immediately
- No, this patient should not be treated with EVT
- The patient should only be treated if his neurological deficit worsens

Q2.6.1ii If no, **why?** (what is your top reason)

- Occlusion too distal to be safely accessible
- Expected benefits too small
- Insufficient support in guidelines/scientific evidence
- Insufficient resources to treat such cases with EVT in our institution
- Other (specify) \_\_\_\_\_

Q2.6.2 If the patient would be eligible for a **trial which randomizes MeVO patients between EVT and no EVT**, would you be willing to randomize?

- Yes
- No, because of practical reasons (e.g. no experience of our team/center to participate in a trial, etc.)
- No, because I have no equipoise (I already know the answer to the question)

Q2.7image

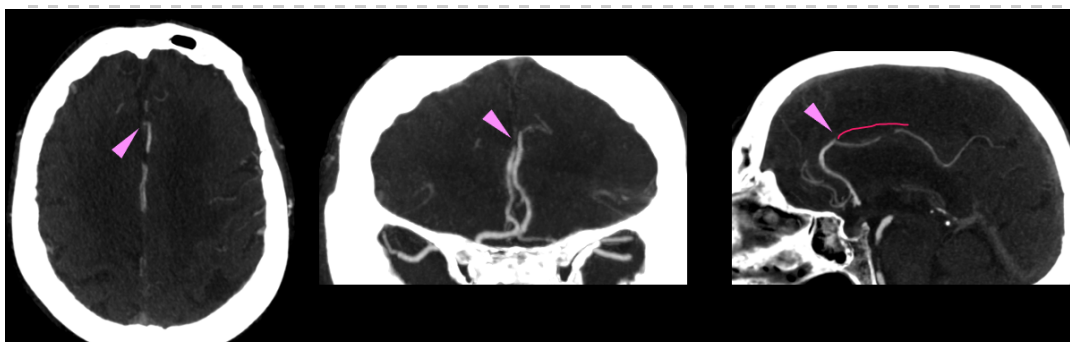

Q2.7 Case 3: If you were to treat this MeVO, what would be your preferred **first-line approach**?

- Direct contact aspiration
- Stent-retriever
- Combined stent-retriever and contact aspiration
- Intra-arterial thrombolytics
- Other (specify) \_\_\_\_\_
- Not applicable (I am not an interventionalist)
- I would not treat any of the presented scenarios

Q2.8 Which **anesthesia** approach would you use in this MeVO?

- I do all EVTs (LVO and MeVO) under general anesthesia
- I do all MeVOs under general anesthesia

- If this patient was even slightly uncooperative (lower threshold than for LVO), I would use general anesthesia
- If this patient was uncooperative (same threshold as for LVO), I would use general anesthesia
- I do all EVT<sub>s</sub> (including MeVO) under local anesthesia/conscious sedation
- I would start under local anesthesia/conscious sedation but convert to general anesthesia if the patient was even slightly uncooperative (lower threshold than for LVO)
- I would start under local anesthesia/conscious sedation but convert to general anesthesia if the patient is uncooperative (same threshold as for LVO)

## Case 2/7

Q3.5 Case 3, scenario 5:

58-year-old male, English teacher, NIHSS 4 with expressive aphasia and right facial palsy. Onset-to-CT time 90 minutes.

ASPECTS 10, core (CBF <30%) volume is 5 ml. Patient is **not eligible for tPA**.

Q3.5image

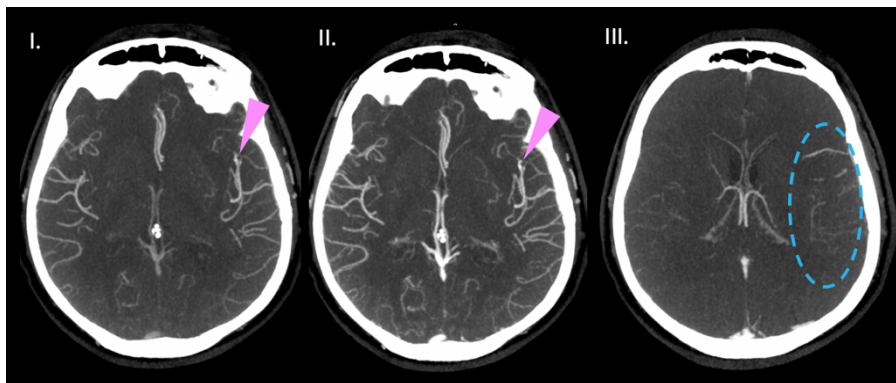

Q3.5.1 Should this patient with MeVO be **treated with EVT**?

- Yes, the patient should be taken to EVT immediately
- No, this patient should not be treated with EVT
- The patient should only be treated if his neurological deficit worsens

Q3.5.1.ii If no, **why?** (what is your top reason)

- Occlusion too distal to be safely accessible
- Expected benefits too small
- Insufficient support in guidelines/scientific evidence for such cases
- Insufficient resources to treat such cases with EVT in our institution
- Other (specify) \_\_\_\_\_

Q3.5.2 If the patient would be eligible for a **trial which randomizes MeVO patients between EVT and no EVT**, would you be willing to randomize?

- Yes
- No, because of practical reasons (e.g. no experience of our team/center to participate in a trial, etc.)
- No, because I have no equipoise (I already know the answer to the question)

Q3.6 Case 3, scenario 6:

80-year-old male, NIHSS 4 with expressive aphasia and right facial palsy. Onset-to-CT time 90 minutes.

ASPECTS 10, core (CBF <30%) volume is 5 ml. Patient is **not eligible for tPA**.

Q3.6image

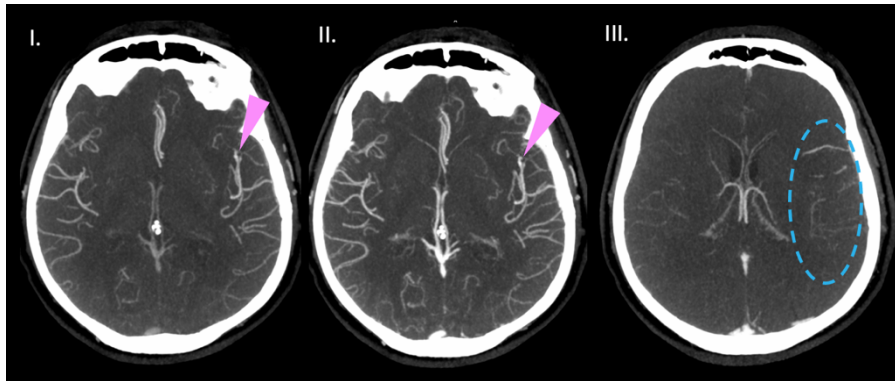

Q3.6.1 Should this patient with MeVO be **treated with EVT**?

- Yes, the patient should be taken to EVT immediately
- No, this patient should not be treated with EVT
- The patient should only be treated if his neurological deficit worsens

Q3.6.1.ii If no, **why**? (what is your top reason)

- Occlusion too distal to be safely accessible
- Expected benefits too small
- Insufficient support in guidelines/scientific evidence for such cases
- Insufficient resources to treat such cases with EVT in our institution
- Other (specify) \_\_\_\_\_

Q3.6.2 If the patient would be eligible for a **trial which randomizes MeVO patients between EVT and no EVT**, would you be willing to randomize?

- Yes
- No, because of practical reasons (e.g. no experience of our team/center to participate in a trial, etc.)
- No, because I have no equipoise (I already know the answer to the question)

Q3.7image

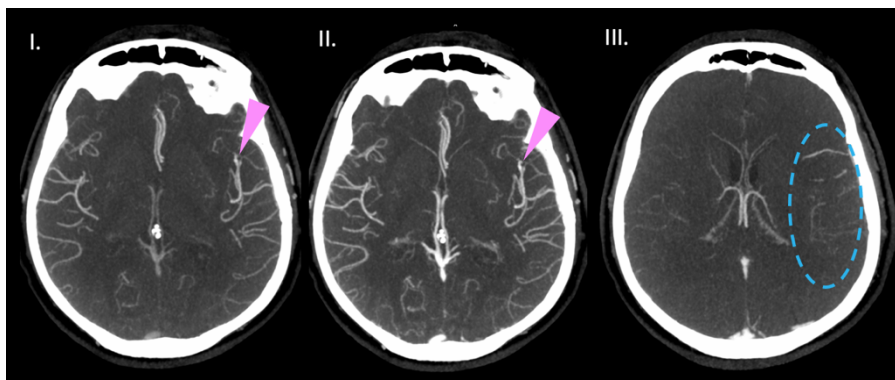

Q3.7 Case 5: If you were to treat this MeVO, what would be your preferred **first-line approach**?

- Direct contact aspiration
- Stent-retriever
- Combined stent-retriever and contact aspiration
- Intra-arterial thrombolytics
- Other (specify) \_\_\_\_\_
- Not applicable (I am not an interventionalist)
- I would not treat any of the presented scenarios

Q3.8 Which **anesthesia** approach would you use in this MeVO?

- I do all EVTs (LVO and MeVO) under general anesthesia
- I do all MeVOs under general anesthesia
- If this patient was even slightly uncooperative (lower threshold than for LVO), I would use general anesthesia
- If this patient was uncooperative (same threshold as for LVO), I would use general anesthesia
- I do all EVTs (including MeVO) under local anesthesia/conscious sedation
- I would start under local anesthesia/conscious sedation but convert to general anesthesia if the patient was even slightly uncooperative (lower threshold than for LVO)
- I would start under local anesthesia/conscious sedation but convert to general anesthesia if the patient is uncooperative (same threshold as for LVO)

#### Q4 Case 4/7

Q4.5 Case 4, Scenario 5:

**52-year-old** male, truck driver, **NIHSS 3** with mild left arm weakness and left homonymous hemianopia. Onset-to-CT time 1 hour 30 minutes. Core (CBF <30%) volume is 4 ml, penumbra (Tmax >6s) 24ml. Patient is **not eligible for tPA**.

Q4.5image

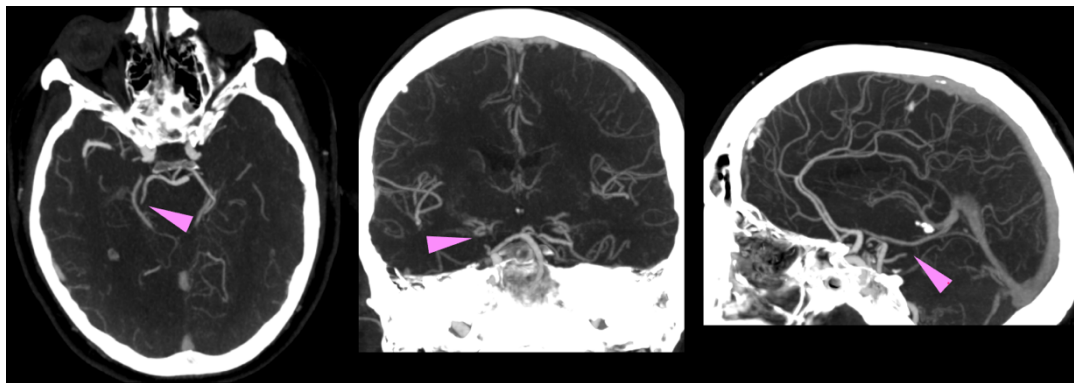

Q4.5.1 Should this patient with MeVO be **treated with EVT**?

- Yes, the patient should be taken to EVT immediately
- No, this patient should not be treated with EVT
- The patient should only be treated if his neurological deficit worsens

Q4.5.1ii If no, **why?** (what is your top reason)

- Occlusion too distal to be safely accessible
- Expected benefits too small
- Insufficient support in guidelines/scientific evidence for such cases
- Insufficient resources to treat such cases with EVT in our institution
- Other (specify) \_\_\_\_\_

Q4.5.2 If the patient would be eligible for a **trial which randomizes MeVO patients between EVT and no EVT**, would you be willing to randomize?

- Yes
- No, because of practical reasons (e.g. no experience of our team/center to participate in a trial, etc.)
- No, because I have no equipoise (I already know the answer to the question)

Q4.7image

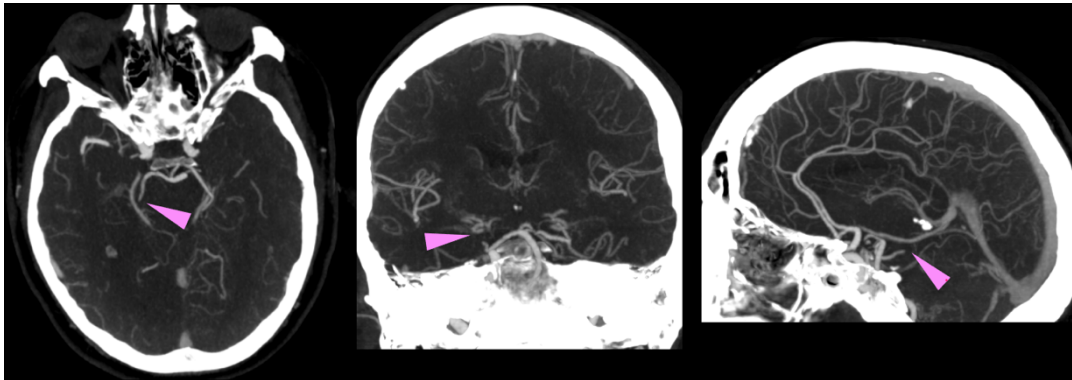

Q4.7 Case 4: If you were to treat this MeVO, what would be your preferred **first-line approach**?

- Direct contact aspiration
- Stent-retriever
- Combined stent-retriever and contact aspiration
- Intra-arterial thrombolytics
- Other (specify) \_\_\_\_\_
- Not applicable (I am not an interventionalist)
- I would not treat any of the presented scenarios

Q4.8 Which **anesthesia** approach would you use in this MeVO?

- I do all EVTs (LVO and MeVO) under general anesthesia
- I do all MeVOs under general anesthesia
- If this patient was even slightly uncooperative (lower threshold than for LVO), I would use general anesthesia
- If this patient was uncooperative (same threshold as for LVO), I would use general anesthesia
- I do all EVTs (including MeVO) under local anesthesia/conscious sedation
- I would start under local anesthesia/conscious sedation but convert to general anesthesia if the patient was even slightly uncooperative (lower threshold than for LVO)
- I would start under local anesthesia/conscious sedation but convert to general anesthesia if the patient is uncooperative (same threshold as for LVO)

Q8 Final Question: Endovascular Tools Availability

Q8.1 Do you think that **appropriate tools/devices exist** to treat the presented MeVOs?

- Yes
- No
- Yes, but there is substantial scope for improvement/further development

Q8.1txt What are the **features of the endovascular tools** which you think would be favorable for pursuing MeVOs in your practice?

Q8.2 Do you have access to the currently **best available tools/devices at your institution** to treat the presented MeVOs?

- Yes
- No
- Not in all cases

Q8.2txt **What does need to happen** or be put in place for you to have access to those tools?

-----

Q8.3 This is the end of the survey. Thank you very much! If you have any further remarks, you can leave them here:

---

---

---

---

---
